# Supplementary material for: Experimental hybridization and backcrossing reveal forces of reproductive isolation in Microbotryum
Source: PubMed Central journal article supplement (PMC3853205; doi:10.1186/1471-2148-13-224), 2013-10-10
Supplement: 1471-2148-13-224-S1.pdf [file 1471-2148-13-224-S1.pdf]

Table S1. Sample size and observed conjugations of the pre-mating experiment. Rates served as base for adjustments for the 'competition' infection experiment.

| Isolate no | Homospecific backcross |     |      | Heterospecific backcross |     |      | Proportions used for adjustment (µl) |
|------------|------------------------|-----|------|--------------------------|-----|------|--------------------------------------|
|            | N                      | con | prop | N                        | con | prop |                                      |
| 1          | 95                     | 14  | 0.29 | 120                      | 6   | 0.10 | 25/ 75                               |
| 2          | 101                    | 18  | 0.36 | 106                      | 11  | 0.21 | 21/ 36                               |
| 3          | 82                     | 17  | 0.41 | 111                      | 10  | 0.18 | 18/ 42                               |
| 4          | 105                    | 3   | 0.06 | 117                      | 5   | 0.09 | 131/ 88                              |
| 5          | 204                    | 39  | 0.38 | 201                      | 94  | 0.47 | -                                    |
| 6          | 201                    | 32  | 0.32 | 201                      | 40  | 0.20 | -                                    |
| 7          | 205                    | 64  | 0.62 | 205                      | 128 | 0.62 | -                                    |
| 8          | 88                     | 4   | 0.10 | 105                      | 18  | 0.34 | 82/ 22                               |
| 9          | 106                    | 11  | 0.21 | 95                       | 7   | 0.15 | 36/ 51                               |
| 10         | 102                    | 15  | 0.29 | 123                      | 5   | 0.08 | 26/ 92                               |
| 11         | 111                    | 15  | 0.27 | 110                      | 9   | 0.16 | 28/ 146                              |
| 12         | 102                    | 35  | 0.69 | 101                      | 19  | 0.38 | 11/ 20                               |
| 13         | 99                     | 21  | 0.42 | 0                        | 0   | 0.00 | 18/ 19                               |
| 14         | 203                    | 73  | 0.72 | 202                      | 66  | 0.33 | -                                    |
| 15         | 113                    | 7   | 0.12 | 108                      | 6   | 0.11 | 61/ 68                               |
| 16         | 103                    | 13  | 0.25 | 106                      | 7   | 0.13 | 30/ 57                               |
| 17         | 281                    | 93  | 0.66 | 610                      | 294 | 0.32 | -                                    |
| 18         | 274                    | 95  | 0.69 | 452                      | 185 | 0.41 | -                                    |
| 19         | 109                    | 17  | 0.31 | 96                       | 14  | 0.29 | 24/ 26                               |
| 20         | 113                    | 16  | 0.28 | 119                      | 12  | 0.20 | 26/ 37                               |
| 21         | 336                    | 106 | 0.63 | 317                      | 146 | 0.46 | -                                    |
| 22         | 108                    | 7   | 0.13 | 121                      | 6   | 0.10 | 58/ 76                               |
| 23         | 108                    | 8   | 0.15 | 101                      | 8   | 0.16 | 51/ 47                               |
| 24         | 571                    | 165 | 0.58 | 610                      | 292 | 0.48 | -                                    |
| 25         | 315                    | 92  | 0.58 | 317                      | 140 | 0.44 | -                                    |
| C1         | 92                     | 8   | 0.17 | (Isolate: 1 x 8)         |     |      |                                      |
| C2         | 104                    | 16  | 0.31 | (Isolate: 2 x 9)         |     |      |                                      |
| C3         | 105                    | 25  | 0.48 | (Isolate: 3 x 10)        |     |      |                                      |
| C4         | 116                    | 24  | 0.41 | (Isolate: 4 x 11)        |     |      |                                      |
| C5         | 91                     | 25  | 0.55 | (Isolate: 12 x 19)       |     |      |                                      |
| C6         | 101                    | 33  | 0.65 | (Isolate: 13 x 20)       |     |      |                                      |
| C7         | 91                     | 12  | 0.26 | (Isolate: 15 x 22)       |     |      |                                      |
| C8         | 97                     | 15  | 0.31 | (Isolate: 16 x 23)       |     |      |                                      |

N: observed number of cells per isolate; con: number of observed conjugations per isolate. Composition (in µl) of homospecific isolate/ heterospecific isolate used for inoculum of infection experiment. C1-C8: Control isolates that were tested for conjugation with sporidia from the same meiotic tetrad.
