# Supplementary material for: Experimental hybridization and backcrossing reveal forces of reproductive isolation in Microbotryum
Source: PubMed Central journal article supplement (PMC3853205; doi:10.1186/1471-2148-13-224), 2013-10-10

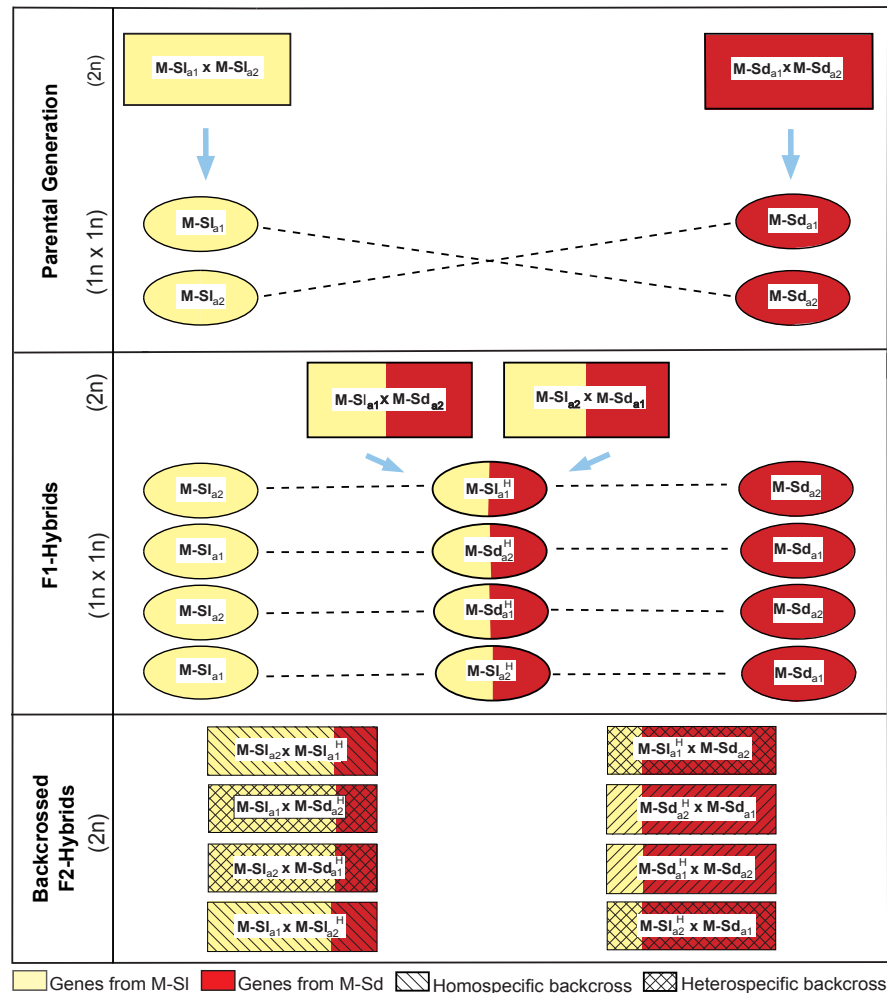

Supplement: 1471-2148-13-224-S2.pdf [file 1471-2148-13-224-S2.pdf]
